# Supplementary material
Source: PubMed Central journal article supplement (PMC540030)
Supplement: nar_33_suppl-1_D481__1.pdf [file nar_33_suppl-1_D481__1.pdf]

|            | <b>Order</b>    | <b>Nuclear</b> | <b>Mitochondrion</b> |
|------------|-----------------|----------------|----------------------|
| Metatheria | Diprotodontia   | 1              | 11                   |
|            | Dasyuromorphia  | 0              | 16                   |
|            | Peramelemorphia | 0              | 5                    |
|            | Didelphimorphia | 1              | 3                    |
| Eutheria   | Cetartiodactyla | 94             | 136                  |
|            | Perissodactyla  | 7              | 9                    |
|            | Primates        | 801            | 108                  |
|            | Rodentia        | 255            | 184                  |
|            | Carnivora       | 23             | 102                  |
|            | Lagomorpha      | 6              | 21                   |
|            | Chiroptera      | 8              | 89                   |
|            | Dermoptera      | 1              | 0                    |
|            | Insectivora     | 6              | 52                   |
|            | Sirenia         | 0              | 1                    |
|            | Proboscidea     | 6              | 6                    |
|            | Hyracoidea      | 0              | 2                    |
|            | Edentata        | 0              | 5                    |
|            | Scandentia      | 1              | 0                    |

Table 1: Family distribution among mammals order

|                | <b>Order</b>   | <b>Nuclear</b> | <b>Mitochondrion</b> | <b>Chloroplast</b> |
|----------------|----------------|----------------|----------------------|--------------------|
| Eudicotyledons | Santalales     | 2              | 0                    | 4                  |
|                | Asterids       | 284            | 1                    | 80                 |
|                | Rosids         | 528            | 9                    | 176                |
|                | Caryophyllales | 32             | 1                    | 31                 |
|                | Saxifragales   | 14             | 0                    | 3                  |
|                | Ranunculales   | 24             | 0                    | 10                 |
|                | Proteales      | 0              | 0                    | 2                  |
| Liliopsida     | Commelinids    | 337            | 1                    | 28                 |
|                | Dioscoreales   | 4              | 0                    | 1                  |
|                | Asparagales    | 17             | 0                    | 21                 |
|                | Liliales       | 7              | 0                    | 2                  |
|                | Alismatales    | 6              | 0                    | 5                  |
|                | Acorales       | 1              | 0                    | 0                  |
| Magnoliids     | Magnoliales    | 0              | 0                    | 1                  |
|                | Piperiales     | 0              | 0                    | 1                  |

Table 2: Family distribution among angiosperm group
